# Supplementary material for: Evaluation of Veterinary-Specific Interpretive Criteria for Susceptibility Testing of Streptococcus equi Subspecies with Trimethoprim-Sulfamethoxazole and Trimethoprim-Sulfadiazine
Source: PubMed Central journal article supplement (PMC5228247; doi:10.1128/jcm.01610-16), 2016-12-28
Supplement: JCM.01610-16_zjm999095328s1.pdf [file JCM.01610-16_zjm999095328s1.pdf]

1 SUPPLEMENTAL DATA

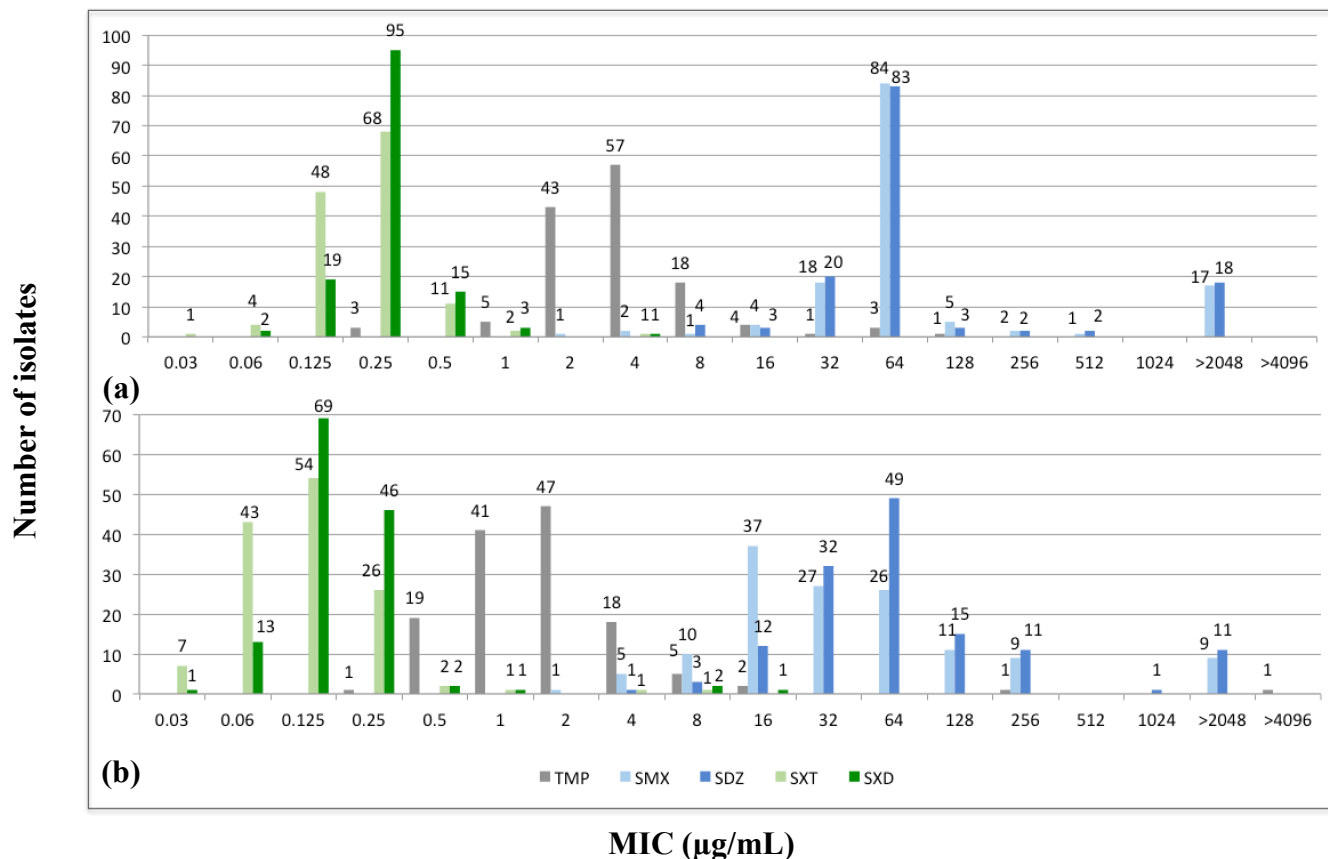

2

3 **FIG 1.** Histograms of MIC distributions for TMP, SMX, SDZ, SXT and SXD for (a) *S. equi* subsp. *equi* (n=135) and (b) *S. equi*  
 4 subsp. *zooepidemicus* (n=135). MIC values for SXT and SXD are plotted based on the TMP concentration in each combination  
 5 antimicrobial (TMP-to-sulfonamide combination ratio 1:19). Tested concentration ranges for SXT and SXD are 0.03/0.6-32/608  
 6 µg/mL.

7

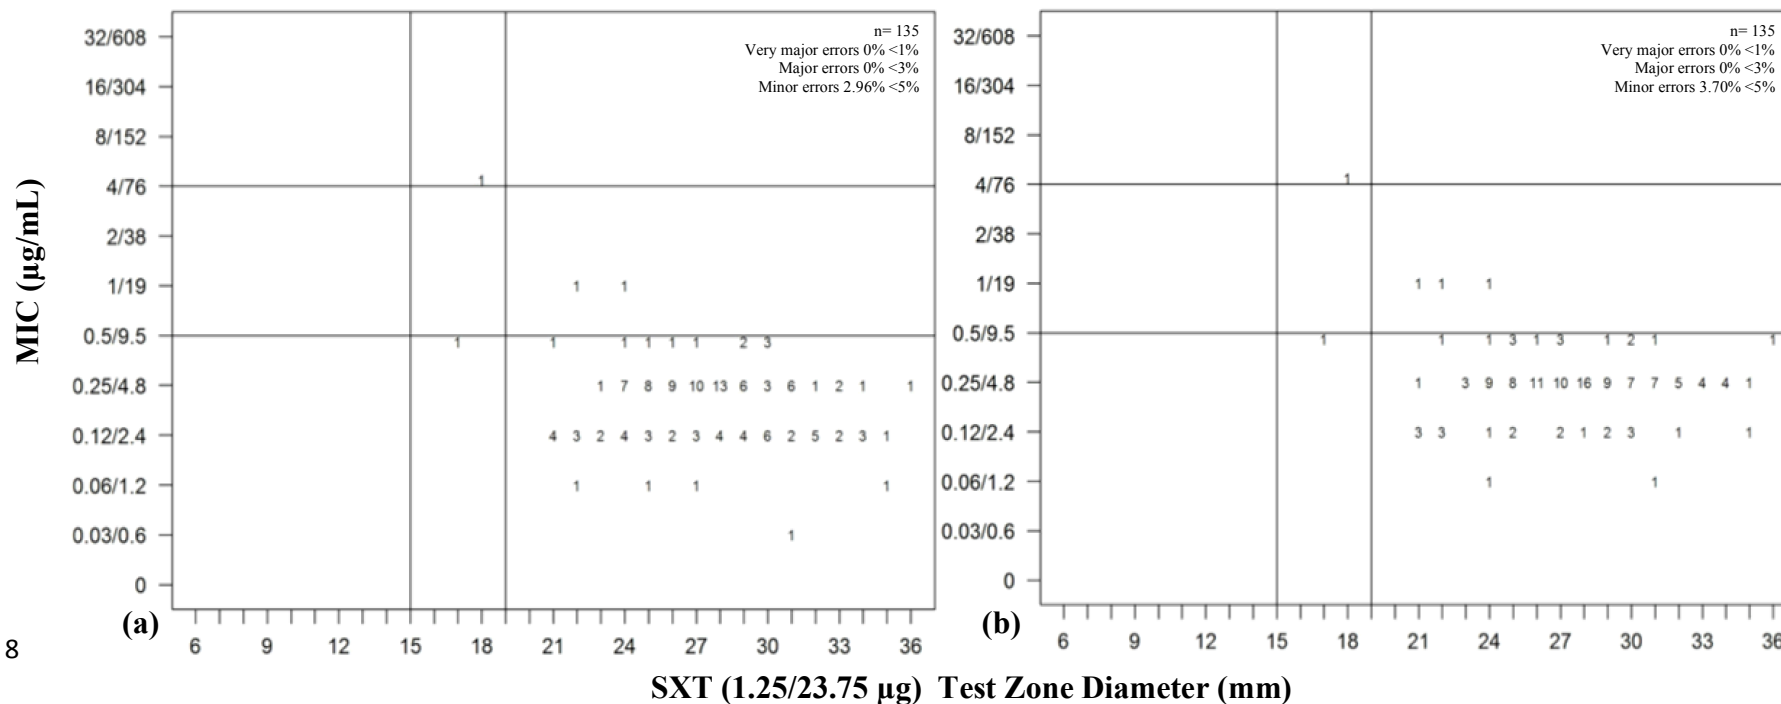

8

9 **FIG 2.** Scattergrams of (a) SXT MIC and (b) SxD MIC versus SXT (1.25/23.75 µg) disk diffusion test zone diameter (mm) for *S.*  
 10 *equi* subsp. *equi* isolates (n=135). Numbers represent the numbers of isolates at each MIC/test zone diameter pair. The horizontal and  
 11 vertical lines represent MIC and disk diffusion cut-offs, respectively.



17 **TABLE 1.** FIC indexes and FIC indexes averages for SXT and SXD in 10 isolates of each *S. equi* subsp. *equi* and *S. equi* subsp.  
 18 *zooepidemicus*

|                                   |    | FIC index |       |                                            |    | FIC index |       |
|-----------------------------------|----|-----------|-------|--------------------------------------------|----|-----------|-------|
| Strain                            |    | SXT       | SXD   | Strain                                     |    | SXT       | SXD   |
| <i>S. equi</i> subsp. <i>equi</i> | 1  | 0.34      | 0.34  | <i>S. equi</i> subsp. <i>zooepidemicus</i> | 1  | 0.1       | 0.43  |
|                                   | 2  | 0.34      | 0.32  |                                            | 2  | 0.38      | 0.29  |
|                                   | 3  | 0.31      | 0.34  |                                            | 3  | 0.31      | 0.48  |
|                                   | 4  | 0.23      | 0.38  |                                            | 4  | 0.31      | 0.32  |
|                                   | 5  | 0.5       | 0.18  |                                            | 5  | 0.43      | 0.45  |
|                                   | 6  | 0.29      | 0.35  |                                            | 6  | 0.31      | 0.31  |
|                                   | 7  | 0.48      | 0.38  |                                            | 7  | 0.47      | 0.43  |
|                                   | 8  | 0.3       | 0.4   |                                            | 8  | 0.35      | 0.46  |
|                                   | 9  | 0.34      | 0.22  |                                            | 9  | 0.32      | 0.45  |
|                                   | 10 | 0.2       | 0.3   |                                            | 10 | 0.37      | 0.19  |
| FIC index average                 |    | 0.333     | 0.321 | FIC index average                          |    | 0.335     | 0.381 |
